# Supplementary material
Source: MDPI journal article supplement (https://www.mdpi.com/2218-0532/91/4/50)
Supplement: s1 [file s1]

## SUPPLEMENTARY MATERIAL

**Table S1.** Two-phase systems tested for separation by CPC.

| <b>System</b>                    | <b>CyHex:MeOAc:EtOH:H<sub>2</sub>O</b> | <b>Equilibration<br/>time (min)</b> |
|----------------------------------|----------------------------------------|-------------------------------------|
| <b>I</b>                         | 0.5:9:3:5.5                            | 1.30                                |
| <b>II</b>                        | 0.5:9:1.5:5.5                          | 4.50                                |
| <b>III</b>                       | 1:9:1:5.5                              | 2.43                                |
| <b>IV</b>                        | 2.5:9:0.5:5.5                          | 0.55                                |
| <b>V</b>                         | 2.5:4.5:0.5:5.5                        | 0.44                                |
| <b>MeOAc:BuOH:H<sub>2</sub>O</b> |                                        |                                     |
| <b>VI</b>                        | 2.5:2.5:5                              | 0.32                                |
| <b>VII</b>                       | 3:2:5                                  | 0.58                                |
| <b>VIII</b>                      | 5:3:5                                  | 1.42                                |

**Table S2.** Calibration curve with rutin standard. Colorimetric method, UV-vis.

| <b>Concentration <math>\mu\text{g mL}^{-1}</math></b> | <b>Absorbance</b> | <b>RSD &lt;10 %</b> |
|-------------------------------------------------------|-------------------|---------------------|
| <b>5</b>                                              | 0.054 $\pm$ 0.003 | 5.45                |
| <b>10</b>                                             | 0.126 $\pm$ 0.008 | 6.38                |

|                                  |                      |             |
|----------------------------------|----------------------|-------------|
| <b>20</b>                        | 0.290 ± 0.005        | 1.79        |
| <b>30</b>                        | 0.492 ± 0.022        | 4.40        |
| <b>40</b>                        | 0.669 ± 0.027        | 3.97        |
| <b>50</b>                        | 0.891 ± 0.036        | 4.00        |
| <b>Extract <i>K. pinnata</i></b> | <b>0.132 ± 0.001</b> | <b>1.07</b> |
| <b>100</b>                       |                      |             |

**Table S3.** Flavonoid content in the aqueous extract determined by UPLC-DAD.

| <b>Peak</b> | <b>Average<br/>areas</b> | <b>RSD</b> | <b>mg mL<sup>-1</sup></b> | <b>mg/mg extract</b> | <b>% mg</b> |
|-------------|--------------------------|------------|---------------------------|----------------------|-------------|
| <b>1</b>    | 85305                    | 4.59       | 8.330                     | 0.0028               | 0.28        |
| <b>3</b>    | 56250                    | 0.152      | 5.955                     | 0.0020               | 0.20        |
| <b>4</b>    | 29697                    | 0.235      | 3.784                     | 0.0013               | 0.13        |
| <b>5</b>    | 141883                   | 0.049      | 12.955                    | 0.0043               | 0.43        |
| <b>6</b>    | 235512                   | 0.043      | 20.609                    | 0.0069               | 0.69        |
| <b>7</b>    | 895990                   | 0.009      | 74.600                    | 0.0249               | 2.48        |
| <b>8</b>    | 34513                    | 0.081      | 4.178                     | 0.0014               | 0.14        |
| <b>9</b>    | 30440                    | 0.112      | 3.845                     | 0.0013               | 0.13        |
| <b>10</b>   | 1478949                  | 0.006      | 122.255                   | 0.0408               | 4.07        |

|              |         |       |          |        |      |
|--------------|---------|-------|----------|--------|------|
| <b>11</b>    | 409369  | 0.009 | 34.821   | 0.0116 | 1.16 |
| <b>12</b>    | 164273  | 0.016 | 14.785   | 0.0049 | 0.49 |
| <b>13</b>    | 40154   | 0.029 | 4.639    | 0.0015 | 0.15 |
| <b>14</b>    | 38928   | 0.034 | 4.539    | 0.0015 | 0.15 |
| <b>Total</b> | 3641263 | 0.018 | 299.0156 | 0.0997 | 9.97 |

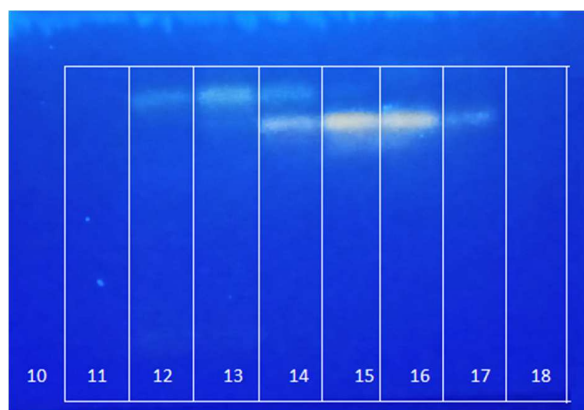

**Figure S1.** TLC of the fractions obtained by CPC. Stationary phase: silica gel F<sub>254</sub> 60. Mobile phase: Ethyl acetate: Formic acid: Acetic acid: Water (100:11:11:26). Revelator: NP and UV light at 365 nm.

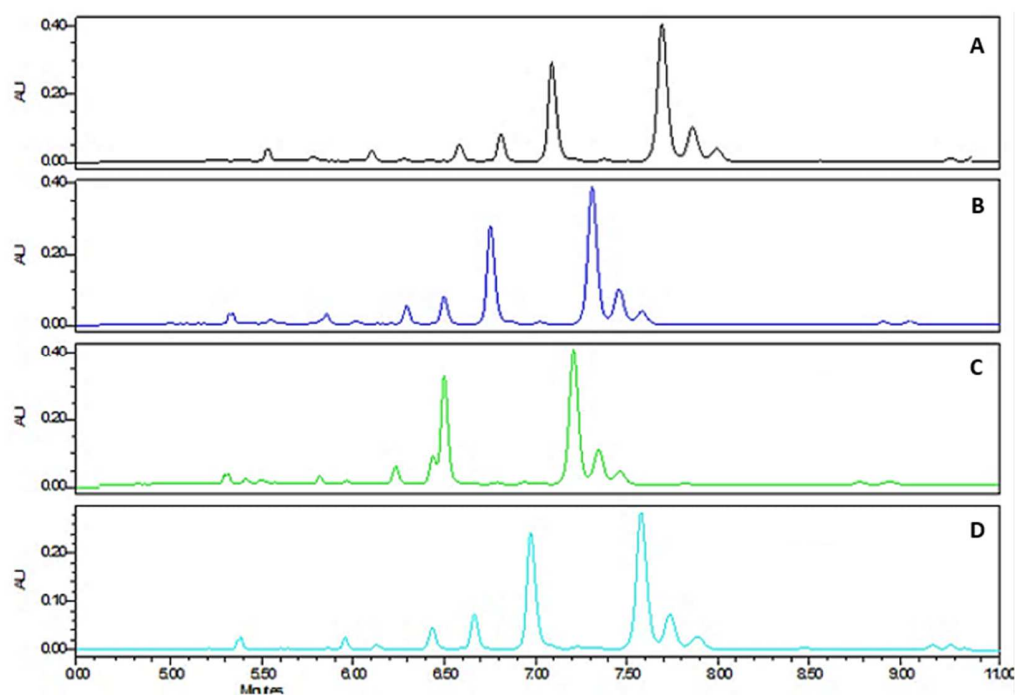

**Fig. S2.** Robustness. Chromatograms of the extract by UPLC-PDA at  $3 \mu\text{g mL}^{-1}$ . **(A)** Extract chromatogram with validated method. **(B)** Increase in the pH of the mobile phase; Formic acid 0.5 %. **(C)** Decrease in column temperature at  $25^{\circ}\text{C}$ . **(D)** Decreased flow;  $0.3 \text{ mL min}^{-1}$ .
